# Supplementary material for: Channelization of water pathway and encapsulation of DS in the SL of the TFC FO membrane as a novel approach for controlling dilutive internal concentration polarization
Source: Royal Society of Chemistry journal article supplement (doi:10.1039/c9ew00201d), 2019-01-01
Supplement: c9ew00201d1.pdf [file c9ew00201d1.pdf]

## Supporting Information

### **Channelization of water pathway and encapsulation of DS in the SL of TFC**

### **FO membrane as a novel approach for controlling dilutive internal concentration polarization**

Mehrzaad Arjmandi<sup>a,b</sup>, Majid Peyravi<sup>c1\*</sup>, Mahdi Pourafshari Chenar<sup>a,b</sup>, Mohsen Jahanshahi<sup>c</sup>

<sup>a</sup>Chemical Engineering Department, Faculty of Engineering, Ferdowsi University of Mashhad, Mashhad, Iran

<sup>b</sup>Research Center of Membrane Processes and Membrane, Faculty of Engineering, Ferdowsi University of Mashhad,  
Mashhad, Iran

<sup>c</sup> Department of Chemical Engineering, Babol Noshirvani University of Technology, Shariati Av., Babol, Iran. P.O.

Box: 484, Postal Code: 47148-7116

#### **2.1. Materials and chemicals**

<sup>1\*</sup>Corresponding author:

Address: Department of Chemical Engineering, Babol Noshirvani University of Technology, Shariati Av., Babol, Iran. P.O. Box: 484, Postal Code: 47148-71167.

Tel/Fax: +98 1132320342

Email: [majidpeyravi@nit.ac.ir](mailto:majidpeyravi@nit.ac.ir), [majidpeyravi@gmail.com](mailto:majidpeyravi@gmail.com)

Table S1: Analysis of Caspian seawater at two stations.

| Properties                    | Unit               | Nour station  | Gorgan station | Average       |
|-------------------------------|--------------------|---------------|----------------|---------------|
| pH                            | ---                | $\cong 7.10$  | $\cong 7.10$   | $\cong 7.10$  |
| Na <sup>+</sup>               | mg L <sup>-1</sup> | $\cong 4470$  | $\cong 5533$   | $\cong 5001$  |
| Ca <sup>2+</sup>              | mg L <sup>-1</sup> | $\cong 160$   | $\cong 249$    | $\cong 204$   |
| Mg <sup>2+</sup>              | mg L <sup>-1</sup> | $\cong 500$   | $\cong 737$    | $\cong 618$   |
| Cl <sup>-</sup>               | mg L <sup>-1</sup> | $\cong 5516$  | $\cong 6900$   | $\cong 6208$  |
| SO <sub>4</sub> <sup>2-</sup> | mg L <sup>-1</sup> | $\cong 1500$  | $\cong 2250$   | $\cong 1875$  |
| K <sup>+</sup>                | mg L <sup>-1</sup> | $\cong 100$   | $\cong 260$    | $\cong 180$   |
| TDS                           | mg L <sup>-1</sup> | $\cong 12200$ | $\cong 15900$  | $\cong 14000$ |

### 3.3. Characterization and performance of MMM-based TFCs

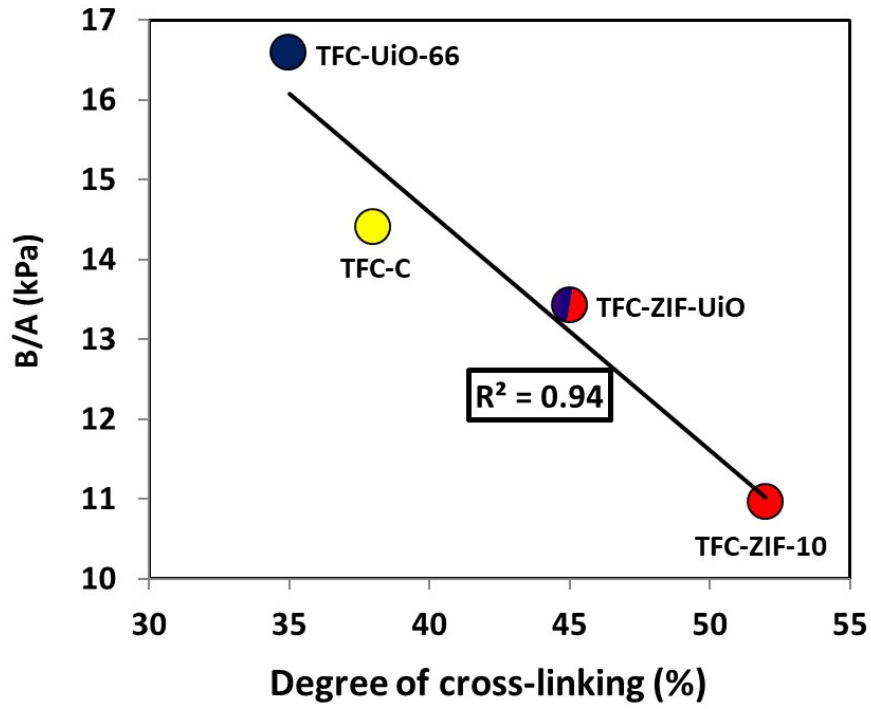

Figure S1: Relationship between B/A and degree of cross-linking for selected TFC membranes in RO experiment.

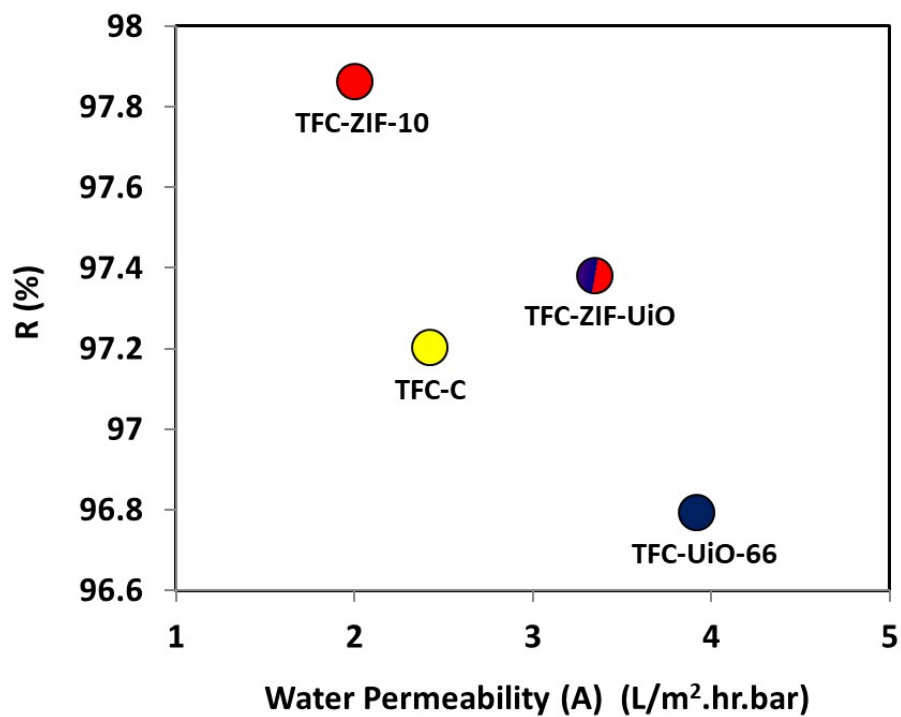

Figure S2: Comparisons between performance of selected TFC membranes in RO experiment.

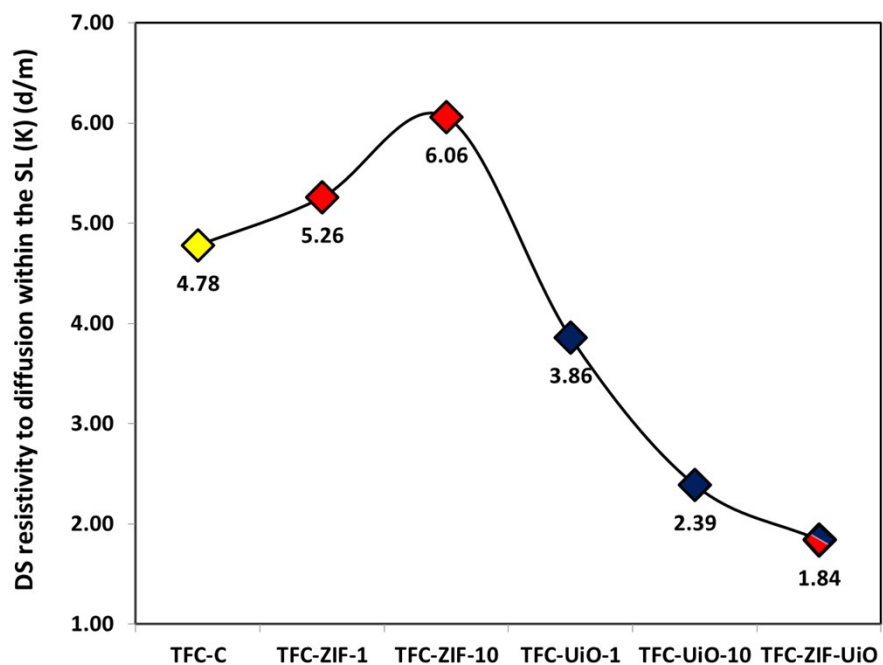

Figure S3: Trend of DS resistance to diffusion into the SL for all TFC membranes.

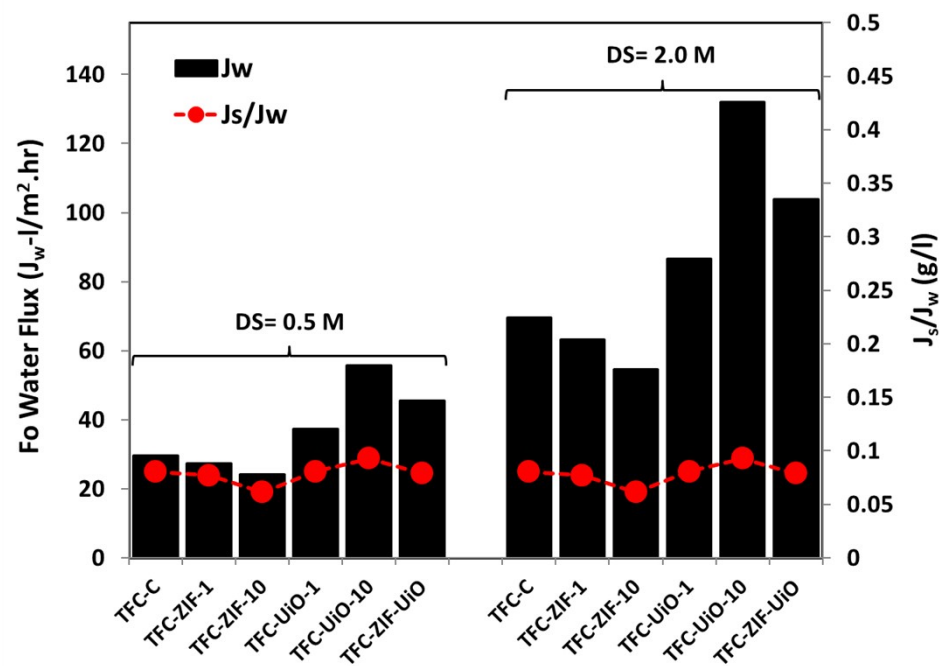

Figure S4: FO water flux and FO reverse solute flux of the TFC membranes in PRO mode using two DS concentrations.
